# Supplementary material for: Fast-Track Discovery of SARS-CoV-2-Neutralizing Antibodies from Human B Cells by Direct Functional Screening
Source: MDPI journal article supplement (doi:10.3390/v16030339), 2024-02-22
Supplement: s1 [file s1]

Supplemental data Table S1:

Table S1: CDR Sequences of the four lead candidates

|          | Light chain    |         |              | Heavy chain |                   |                 |
|----------|----------------|---------|--------------|-------------|-------------------|-----------------|
| mAbs     | CDR1           | CDR2    | CDR3         | CDR1        | CDR2              | CDR3            |
| CoVAb 5  | RASQSISSWLA    | KASSLES | QQYNIYSWT    | DYYMS       | YITSSSSYTNYADSVKG | APGIESSSWKQGVGY |
| CoVAb 13 | QASQGISNYLN    | DASNLET | QQYDNLPRYT   | SNYMN       | VIYSGGSTFQADSVKG  | DRGDAFDI        |
| CoVAb 36 | TGTSSDVGGYNYVS | EVTSRPS | SSYTTSNTLGGV | SNYMS       | VIYSGGITYFADSVKG  | DRRLPHYYYGLDV   |
| CoVAb 47 | RASQGISNYLA    | ASSTLQS | QHLNSYPH     | SNYMS       | IIYPGGSRFYADSVKG  | DLYYYGMDV       |
