# Supplementary material for: Fast-Track Discovery of SARS-CoV-2-Neutralizing Antibodies from Human B Cells by Direct Functional Screening
Source: MDPI journal article supplement (doi:10.3390/v16030339), 2024-02-22

### Supplemental data figure S2:

Sorted clones after the second selection round were once more confirmed by analytical flow cytometry for RBD-binding and absence of huACE2 binding, a read-out, which we used as a surrogate for neutralization. The plot shows examples for clones displaying a non-neutralizing antibody (binding both RBD and huACE2), a neutralizing antibody (CoVAb 36/MTX-COVAB binding only RBD is shown) and the negative control antibody (24C03), which binds neither RBD nor huACE2.

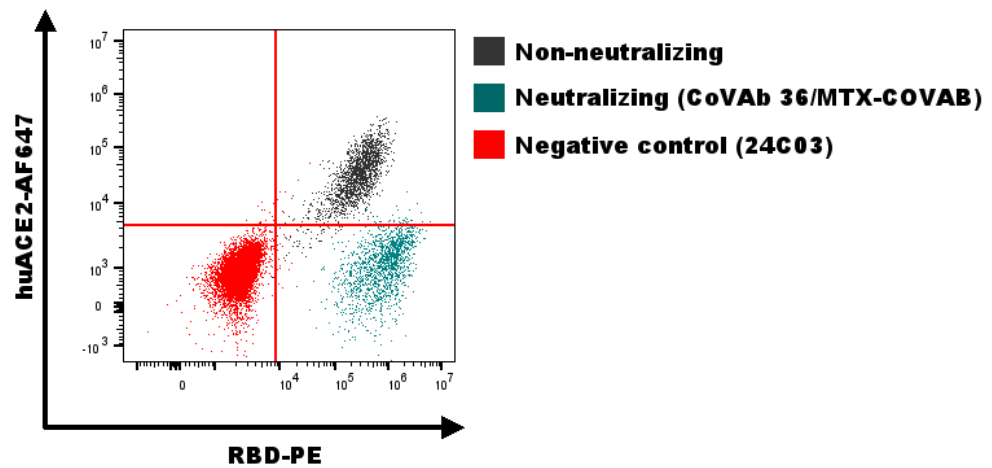

Supplement: s1 [file s1]
