# Supplementary material for: Fast-Track Discovery of SARS-CoV-2-Neutralizing Antibodies from Human B Cells by Direct Functional Screening
Source: MDPI journal article supplement (doi:10.3390/v16030339), 2024-02-22
Supplement: s1 [file s1]

**Supplemental data figure S1:**

Sequences of SARS-CoV-2 variants used in this study are aligned using the multiple sequence alignment tool of Benchling. In order to increase surface expression, the SARS-CoV-2 spike protein was modified by a deletion of the furin cleavage site (aa682-685, "RRAR", replaced by a single alanine) and by a C-terminal truncation of the last 17 amino acids, as described in Material & Methods. Mutations in respect to Wuhan strain are highlighted in red.

|                               | 1                                                 | 50 |
|-------------------------------|---------------------------------------------------|----|
| Wuhan                         | MFVFLVLLPLVSSQCVNLTRTQLPPAYTNSFTRGVYYPDKVFRSSVLHS |    |
| Alpha (B.1.1.7)               | MFVFLVLLPLVSSQCVNLTRTQLPPAYTNSFTRGVYYPDKVFRSSVLHS |    |
| Beta (B.1.351)                | MFVFLVLLPLVSSQCVNLTRTQLPPAYTNSFTRGVYYPDKVFRSSVLHS |    |
| Gamma (B.1.1.248)             | MFVFLVLLPLVSSQCVNLTRTQLPPAYTNSFTRGVYYPDKVFRSSVLHS |    |
| Delta (B.1.617.2)             | MFVFLVLLPLVSSQCVNLTRTQLPPAYTNSFTRGVYYPDKVFRSSVLHS |    |
| Delta plus (B.1.617.2 / AY.1) | MFVFLVLLPLVSSQCVNLTRTQLPPAYTNSFTRGVYYPDKVFRSSVLHS |    |
| Epsilon (B.1.429)             | MFVFLVLLPLVSSQCVNLTRTQLPPAYTNSFTRGVYYPDKVFRSSVLHS |    |
| Iota (B.1.526)                | MFVFLVLLPLVSSQCVNLTRTQLPPAYTNSFTRGVYYPDKVFRSSVLHS |    |
| Kappa (B.1.617.1)             | MFVFLVLLPLVSSQCVNLTRTQLPPAYTNSFTRGVYYPDKVFRSSVLHS |    |
| Lambda (C.37)                 | MFVFLVLLPLVSSQCVNLTRTQLPPAYTNSFTRGVYYPDKVFRSSVLHS |    |
| Omicron (B.1.1.529)           | MFVFLVLLPLVSSQCVNLTRTQLPPAYTNSFTRGVYYPDKVFRSSVLHS |    |

.....

|                               | 51                                                 | 100 |
|-------------------------------|----------------------------------------------------|-----|
| Wuhan                         | TQDLFLPFFSNVTWFHAIHVSGTNGTKRFDNPVLPFNDGVYFASTEKSNI |     |
| Alpha (B.1.1.7)               | TQDLFLPFFSNVTWFHAIHVSGTNGTKRFDNPVLPFNDGVYFASTEKSNI |     |
| Beta (B.1.351)                | TQDLFLPFFSNVTWFHAIHVSGTNGTKRFDNPVLPFNDGVYFASTEKSNI |     |
| Gamma (B.1.1.248)             | TQDLFLPFFSNVTWFHAIHVSGTNGTKRFDNPVLPFNDGVYFASTEKSNI |     |
| Delta (B.1.617.2)             | TQDLFLPFFSNVTWFHAIHVSGTNGTKRFDNPVLPFNDGVYFASTEKSNI |     |
| Delta plus (B.1.617.2 / AY.1) | TQDLFLPFFSNVTWFHAIHVSGTNGTKRFDNPVLPFNDGVYFASTEKSNI |     |
| Epsilon (B.1.429)             | TQDLFLPFFSNVTWFHAIHVSGTNGTKRFDNPVLPFNDGVYFASTEKSNI |     |
| Iota (B.1.526)                | TQDLFLPFFSNVTWFHAIHVSGTNGTKRFDNPVLPFNDGVYFASTEKSNI |     |
| Kappa (B.1.617.1)             | TQDLFLPFFSNVTWFHAIHVSGTNGTKRFDNPVLPFNDGVYFASTEKSNI |     |
| Lambda (C.37)                 | TQDLFLPFFSNVTWFHAIHVSGTNGTKRFDNPVLPFNDGVYFASTEKSNI |     |
| Omicron (B.1.1.529)           | TQDLFLPFFSNVTWFHAIHVSGTNGTKRFDNPVLPFNDGVYFASTEKSNI |     |

.....

|                               | 101                                              | 150 |
|-------------------------------|--------------------------------------------------|-----|
| Wuhan                         | IRGWIFGTTLDSTQSLILVNNATNVVIVKVECFQFCNDPFLGVYHKNK |     |
| Alpha (B.1.1.7)               | IRGWIFGTTLDSTQSLILVNNATNVVIVKVECFQFCNDPFLGVYHKNK |     |
| Beta (B.1.351)                | IRGWIFGTTLDSTQSLILVNNATNVVIVKVECFQFCNDPFLGVYHKNK |     |
| Gamma (B.1.1.248)             | IRGWIFGTTLDSTQSLILVNNATNVVIVKVECFQFCNDPFLGVYHKNK |     |
| Delta (B.1.617.2)             | IRGWIFGTTLDSTQSLILVNNATNVVIVKVECFQFCNDPFLGVYHKNK |     |
| Delta plus (B.1.617.2 / AY.1) | IRGWIFGTTLDSTQSLILVNNATNVVIVKVECFQFCNDPFLGVYHKNK |     |
| Epsilon (B.1.429)             | IRGWIFGTTLDSTQSLILVNNATNVVIVKVECFQFCNDPFLGVYHKNK |     |
| Iota (B.1.526)                | IRGWIFGTTLDSTQSLILVNNATNVVIVKVECFQFCNDPFLGVYHKNK |     |
| Kappa (B.1.617.1)             | IRGWIFGTTLDSTQSLILVNNATNVVIVKVECFQFCNDPFLGVYHKNK |     |
| Lambda (C.37)                 | IRGWIFGTTLDSTQSLILVNNATNVVIVKVECFQFCNDPFLGVYHKNK |     |
| Omicron (B.1.1.529)           | IRGWIFGTTLDSTQSLILVNNATNVVIVKVECFQFCNDPFLGVYHKNK |     |

.....

|                               | 151                                                | 200 |
|-------------------------------|----------------------------------------------------|-----|
| Wuhan                         | SWMESEFRVYSSANNCTFEYVSQPFLMDLEGKQGNFKNLREFVFKNIDGY |     |
| Alpha (B.1.1.7)               | SWMESEFRVYSSANNCTFEYVSQPFLMDLEGKQGNFKNLREFVFKNIDGY |     |
| Beta (B.1.351)                | SWMESEFRVYSSANNCTFEYVSQPFLMDLEGKQGNFKNLREFVFKNIDGY |     |
| Gamma (B.1.1.248)             | SWMESEFRVYSSANNCTFEYVSQPFLMDLEGKQGNFKNLREFVFKNIDGY |     |
| Delta (B.1.617.2)             | SWMESEFRVYSSANNCTFEYVSQPFLMDLEGKQGNFKNLREFVFKNIDGY |     |
| Delta plus (B.1.617.2 / AY.1) | SWMESEFRVYSSANNCTFEYVSQPFLMDLEGKQGNFKNLREFVFKNIDGY |     |
| Epsilon (B.1.429)             | SWMESEFRVYSSANNCTFEYVSQPFLMDLEGKQGNFKNLREFVFKNIDGY |     |
| Iota (B.1.526)                | SWMESEFRVYSSANNCTFEYVSQPFLMDLEGKQGNFKNLREFVFKNIDGY |     |
| Kappa (B.1.617.1)             | SWMESEFRVYSSANNCTFEYVSQPFLMDLEGKQGNFKNLREFVFKNIDGY |     |
| Lambda (C.37)                 | SWMESEFRVYSSANNCTFEYVSQPFLMDLEGKQGNFKNLREFVFKNIDGY |     |
| Omicron (B.1.1.529)           | SWMESEFRVYSSANNCTFEYVSQPFLMDLEGKQGNFKNLREFVFKNIDGY |     |

.....

|                               |                                                    |     |
|-------------------------------|----------------------------------------------------|-----|
|                               | 201                                                | 250 |
| Wuhan                         | FKIYSKHTPINL--VRDLPQGFSALEPLVDLPIGINITRFQTLALHRSY  |     |
| Alpha (B.1.1.7)               | FKIYSKHTPINL--VRDLPQGFSALEPLVDLPIGINITRFQTLALHRSY  |     |
| Beta (B.1.351)                | FKIYSKHTPINL--VRGLPQGFSALEPLVDLPIGINITRFQT---LHRSY |     |
| Gamma (B.1.1.248)             | FKIYSKHTPINL--VRDLPQGFSALEPLVDLPIGINITRFQTLALHRSY  |     |
| Delta (B.1.617.2)             | FKIYSKHTPINL--VRDLPQGFSALEPLVDLPIGINITRFQTLALHRSY  |     |
| Delta plus (B.1.617.2 / AY.1) | FKIYSKHTPINL--VRDLPQGFSALEPLVDLPIGINITRFQTLALHRSY  |     |
| Epsilon (B.1.429)             | FKIYSKHTPINL--VRDLPQGFSALEPLVDLPIGINITRFQTLALHRSY  |     |
| Iota (B.1.526)                | FKIYSKHTPINL--VRDLPQGFSALEPLVDLPIGINITRFQTLALHRSY  |     |
| Kappa (B.1.617.1)             | FKIYSKHTPINL--VRDLPQGFSALEPLVDLPIGINITRFQTLALHRSY  |     |
| Lambda (C.37)                 | FKIYSKHTPINL--VRDLPQGFSALEPLVDLPIGINITRFQTLALHN--  |     |
| Omicron (B.1.1.529)           | FKIYSKHTPIIVREPEDLPQGFSALEPLVDLPIGINITRFQTLALHRSY  |     |

|                               |                                                   |     |
|-------------------------------|---------------------------------------------------|-----|
|                               | 251                                               | 300 |
| Wuhan                         | LTPGDSSSGWTAGAAAYVGYLQPRTFLLKYNENGTITDAVDCALDPLSE |     |
| Alpha (B.1.1.7)               | LTPGDSSSGWTAGAAAYVGYLQPRTFLLKYNENGTITDAVDCALDPLSE |     |
| Beta (B.1.351)                | LTPGDSSSGWTAGAAAYVGYLQPRTFLLKYNENGTITDAVDCALDPLSE |     |
| Gamma (B.1.1.248)             | LTPGDSSSGWTAGAAAYVGYLQPRTFLLKYNENGTITDAVDCALDPLSE |     |
| Delta (B.1.617.2)             | LTPGDSSSGWTAGAAAYVGYLQPRTFLLKYNENGTITDAVDCALDPLSE |     |
| Delta plus (B.1.617.2 / AY.1) | LTPGDSSSGITAGAAAYVGYLQPRTFLLKYNENGTITDAVDCALDPLSE |     |
| Epsilon (B.1.429)             | LTPGDSSSGWTAGAAAYVGYLQPRTFLLKYNENGTITDAVDCALDPLSE |     |
| Iota (B.1.526)                | LTPGSSSGWTAGAAAYVGYLQPRTFLLKYNENGTITDAVDCALDPLSE  |     |
| Kappa (B.1.617.1)             | LTPGDSSSGWTAGAAAYVGYLQPRTFLLKYNENGTITDAVDCALDPLSE |     |
| Lambda (C.37)                 | -----SSSGWTAGAAAYVGYLQPRTFLLKYNENGTITDAVDCALDPLSE |     |
| Omicron (B.1.1.529)           | LTPGDSSSGWTAGAAAYVGYLQPRTFLLKYNENGTITDAVDCALDPLSE |     |

|                               |                                                    |     |
|-------------------------------|----------------------------------------------------|-----|
|                               | 301                                                | 350 |
| Wuhan                         | TKCTLKSFTVEKGIYQTSNFRVQPTESIVRFPNITNLCPFGEVFNATRFA |     |
| Alpha (B.1.1.7)               | TKCTLKSFTVEKGIYQTSNFRVQPTESIVRFPNITNLCPFGEVFNATRFA |     |
| Beta (B.1.351)                | TKCTLKSFTVEKGIYQTSNFRVQPTESIVRFPNITNLCPFGEVFNATRFA |     |
| Gamma (B.1.1.248)             | TKCTLKSFTVEKGIYQTSNFRVQPTESIVRFPNITNLCPFGEVFNATRFA |     |
| Delta (B.1.617.2)             | TKCTLKSFTVEKGIYQTSNFRVQPTESIVRFPNITNLCPFGEVFNATRFA |     |
| Delta plus (B.1.617.2 / AY.1) | TKCTLKSFTVEKGIYQTSNFRVQPTESIVRFPNITNLCPFGEVFNATRFA |     |
| Epsilon (B.1.429)             | TKCTLKSFTVEKGIYQTSNFRVQPTESIVRFPNITNLCPFGEVFNATRFA |     |
| Iota (B.1.526)                | TKCTLKSFTVEKGIYQTSNFRVQPTESIVRFPNITNLCPFGEVFNATRFA |     |
| Kappa (B.1.617.1)             | TKCTLKSFTVEKGIYQTSNFRVQPTESIVRFPNITNLCPFGEVFNATRFA |     |
| Lambda (C.37)                 | TKCTLKSFTVEKGIYQTSNFRVQPTESIVRFPNITNLCPFGEVFNATRFA |     |
| Omicron (B.1.1.529)           | TKCTLKSFTVEKGIYQTSNFRVQPTESIVRFPNITNLCPFDEVFNATRFA |     |

|                               |                                                     |     |
|-------------------------------|-----------------------------------------------------|-----|
|                               | 351                                                 | 400 |
| Wuhan                         | SVYAWNRKRISNCVADYSVLYNSASFSTFKCYGVSP TKLNDLCFTNVYAD |     |
| Alpha (B.1.1.7)               | SVYAWNRKRISNCVADYSVLYNSASFSTFKCYGVSP TKLNDLCFTNVYAD |     |
| Beta (B.1.351)                | SVYAWNRKRISNCVADYSVLYNSASFSTFKCYGVSP TKLNDLCFTNVYAD |     |
| Gamma (B.1.1.248)             | SVYAWNRKRISNCVADYSVLYNSASFSTFKCYGVSP TKLNDLCFTNVYAD |     |
| Delta (B.1.617.2)             | SVYAWNRKRISNCVADYSVLYNSASFSTFKCYGVSP TKLNDLCFTNVYAD |     |
| Delta plus (B.1.617.2 / AY.1) | SVYAWNRKRISNCVADYSVLYNSASFSTFKCYGVSP TKLNDLCFTNVYAD |     |
| Epsilon (B.1.429)             | SVYAWNRKRISNCVADYSVLYNSASFSTFKCYGVSP TKLNDLCFTNVYAD |     |
| Iota (B.1.526)                | SVYAWNRKRISNCVADYSVLYNSASFSTFKCYGVSP TKLNDLCFTNVYAD |     |
| Kappa (B.1.617.1)             | SVYAWNRKRISNCVADYSVLYNSASFSTFKCYGVSP TKLNDLCFTNVYAD |     |
| Lambda (C.37)                 | SVYAWNRKRISNCVADYSVLYNSASFSTFKCYGVSP TKLNDLCFTNVYAD |     |
| Omicron (B.1.1.529)           | SVYAWNRKRISNCVADYSVLYNLADFFTFKCYGVSP TKLNDLCFTNVYAD |     |

|                               | 401                                                 | 450 |
|-------------------------------|-----------------------------------------------------|-----|
| Wuhan                         | SFVIRGDEVQRQIAPGQTGKIADYNYKLPDDFTGCVIAWNSNNLDSKVGGN |     |
| Alpha (B.1.1.7)               | SFVIRGDEVQRQIAPGQTGKIADYNYKLPDDFTGCVIAWNSNNLDSKVGGN |     |
| Beta (B.1.351)                | SFVIRGDEVQRQIAPGQTGNIADYNYKLPDDFTGCVIAWNSNNLDSKVGGN |     |
| Gamma (B.1.1.248)             | SFVIRGDEVQRQIAPGQTGHIADYNYKLPDDFTGCVIAWNSNNLDSKVGGN |     |
| Delta (B.1.617.2)             | SFVIRGDEVQRQIAPGQTGKIADYNYKLPDDFTGCVIAWNSNNLDSKVGGN |     |
| Delta plus (B.1.617.2 / AY.1) | SFVIRGDEVQRQIAPGQTGNIADYNYKLPDDFTGCVIAWNSNNLDSKVGGN |     |
| Epsilon (B.1.429)             | SFVIRGDEVQRQIAPGQTGKIADYNYKLPDDFTGCVIAWNSNNLDSKVGGN |     |
| Iota (B.1.526)                | SFVIRGDEVQRQIAPGQTGKIADYNYKLPDDFTGCVIAWNSNNLDSKVGGN |     |
| Kappa (B.1.617.1)             | SFVIRGDEVQRQIAPGQTGKIADYNYKLPDDFTGCVIAWNSNNLDSKVGGN |     |
| Lambda (C.37)                 | SFVIRGDEVQRQIAPGQTGKIADYNYKLPDDFTGCVIAWNSNNLDSKVGGN |     |
| Omicron (B.1.1.529)           | SFVIRGDEVQRQIAPGQTGNIADYNYKLPDDFTGCVIAWNSNNLDSKVSGN |     |

|                               | 451                                                 | 500 |
|-------------------------------|-----------------------------------------------------|-----|
| Wuhan                         | YNYLYRLFRKSNLKPFFERDISTEIQAGSTPCNGVEGFNCYFPLQSYGFQ  |     |
| Alpha (B.1.1.7)               | YNYLYRLFRKSNLKPFFERDISTEIQAGSTPCNGVEGFNCYFPLQSYGFQ  |     |
| Beta (B.1.351)                | YNYLYRLFRKSNLKPFFERDISTEIQAGSTPCNGVKGFNCYFPLQSYGFQ  |     |
| Gamma (B.1.1.248)             | YNYLYRLFRKSNLKPFFERDISTEIQAGSTPCNGVKGFNCYFPLQSYGFQ  |     |
| Delta (B.1.617.2)             | YNYRYRLFRKSNLKPFFERDISTEIQAGSKPCNGVEGFNCYFPLQSYGFQ  |     |
| Delta plus (B.1.617.2 / AY.1) | YNYRYRLFRKSNLKPFFERDISTEIQAGSKPCNGVEGFNCYFPLQSYGFQ  |     |
| Epsilon (B.1.429)             | YNYRYRLFRKSNLKPFFERDISTEIQAGSTPCNGVEGFNCYFPLQSYGFQ  |     |
| Iota (B.1.526)                | YNYLYRLFRKSNLKPFFERDISTEIQAGNTPCNGVKGFNCYFPLQSYGFQ  |     |
| Kappa (B.1.617.1)             | YNYRYRLFRKSNLKPFFERDISTEIQAGSTPCNGVQGFNCYFPLQSYGFQ  |     |
| Lambda (C.37)                 | YNYQYRLFRKSNLKPFFERDISTEIQAGSTPCNGVEGFNCYSPQLQSYGFQ |     |
| Omicron (B.1.1.529)           | YNYLYRLFRKSNLKPFFERDISTEIQAGNKPNGVAGFNCYFPLRSYSFR   |     |

|                               | 501                                                | 550 |
|-------------------------------|----------------------------------------------------|-----|
| Wuhan                         | PTNGVGYQPYRVVVLSEFLLHAPATVCGPKKSTNLVKNKCVNFNFNGLTG |     |
| Alpha (B.1.1.7)               | PTYGVGYQPYRVVVLSEFLLHAPATVCGPKKSTNLVKNKCVNFNFNGLTG |     |
| Beta (B.1.351)                | PTYGVGYQPYRVVVLSEFLLHAPATVCGPKKSTNLVKNKCVNFNFNGLTG |     |
| Gamma (B.1.1.248)             | PTYGVGYQPYRVVVLSEFLLHAPATVCGPKKSTNLVKNKCVNFNFNGLTG |     |
| Delta (B.1.617.2)             | PTNGVGYQPYRVVVLSEFLLHAPATVCGPKKSTNLVKNKCVNFNFNGLTG |     |
| Delta plus (B.1.617.2 / AY.1) | PTNGVGYQPYRVVVLSEFLLHAPATVCGPKKSTNLVKNKCVNFNFNGLTG |     |
| Epsilon (B.1.429)             | PTNGVGYQPYRVVVLSEFLLHAPATVCGPKKSTNLVKNKCVNFNFNGLTG |     |
| Iota (B.1.526)                | PTNGVGYQPYRVVVLSEFLLHAPATVCGPKKSTNLVKNKCVNFNFNGLTG |     |
| Kappa (B.1.617.1)             | PTNGVGYQPYRVVVLSEFLLHAPATVCGPKKSTNLVKNKCVNFNFNGLTG |     |
| Lambda (C.37)                 | PTNGVGYQPYRVVVLSEFLLHAPATVCGPKKSTNLVKNKCVNFNFNGLTG |     |
| Omicron (B.1.1.529)           | PTYGVGHQPYRVVVLSEFLLHAPATVCGPKKSTNLVKNKCVNFNFNGLKG |     |

|                               | 551                                                  | 600 |
|-------------------------------|------------------------------------------------------|-----|
| Wuhan                         | TGVLTESNKKFLPFQQFGRDIADTTDAVRDPQTLTLEILDITPCSFGGVSVI |     |
| Alpha (B.1.1.7)               | TGVLTESNKKFLPFQQFGRDIADTTDAVRDPQTLTLEILDITPCSFGGVSVI |     |
| Beta (B.1.351)                | TGVLTESNKKFLPFQQFGRDIADTTDAVRDPQTLTLEILDITPCSFGGVSVI |     |
| Gamma (B.1.1.248)             | TGVLTESNKKFLPFQQFGRDIADTTDAVRDPQTLTLEILDITPCSFGGVSVI |     |
| Delta (B.1.617.2)             | TGVLTESNKKFLPFQQFGRDIADTTDAVRDPQTLTLEILDITPCSFGGVSVI |     |
| Delta plus (B.1.617.2 / AY.1) | TGVLTESNKKFLPFQQFGRDIADTTDAVRDPQTLTLEILDITPCSFGGVSVI |     |
| Epsilon (B.1.429)             | TGVLTESNKKFLPFQQFGRDIADTTDAVRDPQTLTLEILDITPCSFGGVSVI |     |
| Iota (B.1.526)                | TGVLTESNKKFLPFQQFGRDIADTTDAVRDPQTLTLEILDITPCSFGGVSVI |     |
| Kappa (B.1.617.1)             | TGVLTESNKKFLPFQQFGRDIADTTDAVRDPQTLTLEILDITPCSFGGVSVI |     |
| Lambda (C.37)                 | TGVLTESNKKFLPFQQFGRDIADTTDAVRDPQTLTLEILDITPCSFGGVSVI |     |
| Omicron (B.1.1.529)           | TGVLTESNKKFLPFQQFGRDIADTTDAVRDPQTLTLEILDITPCSFGGVSVI |     |

|                               | 601                                                | 650 |
|-------------------------------|----------------------------------------------------|-----|
| Wuhan                         | TPGTNTSNQVAVLYQDVNCTEVPVAIHADQLTPTWRVYSTGSNVFQTRAG |     |
| Alpha (B.1.1.7)               | TPGTNTSNQVAVLYQGVNCTEVPVAIHADQLTPTWRVYSTGSNVFQTRAG |     |
| Beta (B.1.351)                | TPGTNTSNQVAVLYQGVNCTEVPVAIHADQLTPTWRVYSTGSNVFQTRAG |     |
| Gamma (B.1.1.248)             | TPGTNTSNQVAVLYQGVNCTEVPVAIHADQLTPTWRVYSTGSNVFQTRAG |     |
| Delta (B.1.617.2)             | TPGTNTSNQVAVLYQGVNCTEVPVAIHADQLTPTWRVYSTGSNVFQTRAG |     |
| Delta plus (B.1.617.2 / AY.1) | TPGTNTSNQVAVLYQGVNCTEVPVAIHADQLTPTWRVYSTGSNVFQTRAG |     |
| Epsilon (B.1.429)             | TPGTNTSNQVAVLYQDVNCTEVPVAIHADQLTPTWRVYSTGSNVFQTRAG |     |
| Iota (B.1.526)                | TPGTNTSNQVAVLYQGVNCTEVPVAIHADQLTPTWRVYSTGSNVFQTRAG |     |
| Kappa (B.1.617.1)             | TPGTNTSNQVAVLYQGVNCTEVPVAIHADQLTPTWRVYSTGSNVFQTRAG |     |
| Lambda (C.37)                 | TPGTNTSNQVAVLYQGVNCTEVPVAIHADQLTPTWRVYSTGSNVFQTRAG |     |
| Omicron (B.1.1.529)           | TPGTNTSNQVAVLYQGVNCTEVPVAIHADQLTPTWRVYSTGSNVFQTRAG |     |

|                               | 651                                                | 700 |
|-------------------------------|----------------------------------------------------|-----|
| Wuhan                         | CLIGAEHVNNSYECDIPIGAGICASYQTQTNSPA---SVASQSIIAYTMS |     |
| Alpha (B.1.1.7)               | CLIGAEHVNNSYECDIPIGAGICASYQTQTNSHAGARSVASQSIIAYTMS |     |
| Beta (B.1.351)                | CLIGAEHVNNSYECDIPIGAGICASYQTQTNSPA---SVASQSIIAYTMS |     |
| Gamma (B.1.1.248)             | CLIGAEHVNNSYECDIPIGAGICASYQTQTNSPA---SVASQSIIAYTMS |     |
| Delta (B.1.617.2)             | CLIGAEHVNNSYECDIPIGAGICASYQTQTNSRA---SVASQSIIAYTMS |     |
| Delta plus (B.1.617.2 / AY.1) | CLIGAEHVNNSYECDIPIGAGICASYQTQTNSRA---SVASQSIIAYTMS |     |
| Epsilon (B.1.429)             | CLIGAEHVNNSYECDIPIGAGICASYQTQTNSPA---SVASQSIIAYTMS |     |
| Iota (B.1.526)                | CLIGAEHVNNSYECDIPIGAGICASYQTQTNSPA---SVASQSIIAYTMS |     |
| Kappa (B.1.617.1)             | CLIGAEHVNNSYECDIPIGAGICASYQTQTNSRA---SVASQSIIAYTMS |     |
| Lambda (C.37)                 | CLIGAEHVNNSYECDIPIGAGICASYQTQTNSPA---SVASQSIIAYTMS |     |
| Omicron (B.1.1.529)           | CLIGAEHVNNSYECDIPIGAGICASYQTQTNSHA---SVASQSIIAYTMS |     |

|                               | 701                                                | 750 |
|-------------------------------|----------------------------------------------------|-----|
| Wuhan                         | LGAENSVAYSNNSIAIPTNFTISVTTEILPVSMTKTSVDCTMYICGDSTE |     |
| Alpha (B.1.1.7)               | LGAENSVAYSNNSIAIPTNFTISVTTEILPVSMTKTSVDCTMYICGDSTE |     |
| Beta (B.1.351)                | LGVENSVAYSNNSIAIPTNFTISVTTEILPVSMTKTSVDCTMYICGDSTE |     |
| Gamma (B.1.1.248)             | LGAENSVAYSNNSIAIPTNFTISVTTEILPVSMTKTSVDCTMYICGDSTE |     |
| Delta (B.1.617.2)             | LGAENSVAYSNNSIAIPTNFTISVTTEILPVSMTKTSVDCTMYICGDSTE |     |
| Delta plus (B.1.617.2 / AY.1) | LGAENSVAYSNNSIAIPTNFTISVTTEILPVSMTKTSVDCTMYICGDSTE |     |
| Epsilon (B.1.429)             | LGAENSVAYSNNSIAIPTNFTISVTTEILPVSMTKTSVDCTMYICGDSTE |     |
| Iota (B.1.526)                | LGVENSVAYSNNSIAIPTNFTISVTTEILPVSMTKTSVDCTMYICGDSTE |     |
| Kappa (B.1.617.1)             | LGAENSVAYSNNSIAIPTNFTISVTTEILPVSMTKTSVDCTMYICGDSTE |     |
| Lambda (C.37)                 | LGAENSVAYSNNSIAIPTNFTISVTTEILPVSMTKTSVDCTMYICGDSTE |     |
| Omicron (B.1.1.529)           | LGAENSVAYSNNSIAIPTNFTISVTTEILPVSMTKTSVDCTMYICGDSTE |     |

|                               | 751                                                | 800 |
|-------------------------------|----------------------------------------------------|-----|
| Wuhan                         | CSNLLLQYGSFCTQLNRALTGIAVEQDKNTQEVFAQVKQIYKTPPIKDFG |     |
| Alpha (B.1.1.7)               | CSNLLLQYGSFCTQLNRALTGIAVEQDKNTQEVFAQVKQIYKTPPIKDFG |     |
| Beta (B.1.351)                | CSNLLLQYGSFCTQLNRALTGIAVEQDKNTQEVFAQVKQIYKTPPIKDFG |     |
| Gamma (B.1.1.248)             | CSNLLLQYGSFCTQLNRALTGIAVEQDKNTQEVFAQVKQIYKTPPIKDFG |     |
| Delta (B.1.617.2)             | CSNLLLQYGSFCTQLNRALTGIAVEQDKNTQEVFAQVKQIYKTPPIKDFG |     |
| Delta plus (B.1.617.2 / AY.1) | CSNLLLQYGSFCTQLNRALTGIAVEQDKNTQEVFAQVKQIYKTPPIKDFG |     |
| Epsilon (B.1.429)             | CSNLLLQYGSFCTQLNRALTGIAVEQDKNTQEVFAQVKQIYKTPPIKDFG |     |
| Iota (B.1.526)                | CSNLLLQYGSFCTQLNRALTGIAVEQDKNTQEVFAQVKQIYKTPPIKDFG |     |
| Kappa (B.1.617.1)             | CSNLLLQYGSFCTQLNRALTGIAVEQDKNTQEVFAQVKQIYKTPPIKDFG |     |
| Lambda (C.37)                 | CSNLLLQYGSFCTQLNRALTGIAVEQDKNTQEVFAQVKQIYKTPPIKDFG |     |
| Omicron (B.1.1.529)           | CSNLLLQYGSFCTQLNRALTGIAVEQDKNTQEVFAQVKQIYKTPPIKDFG |     |

|                               | 801                           | 850                   |
|-------------------------------|-------------------------------|-----------------------|
| Wuhan                         | GFNFSQILPDPSKPSKRSFIEDLLFNKVT | LADAGFIKQYGDCLGDIAARD |
| Alpha (B.1.1.7)               | GFNFSQILPDPSKPSKRSFIEDLLFNKVT | LADAGFIKQYGDCLGDIAARD |
| Beta (B.1.351)                | GFNFSQILPDPSKPSKRSFIEDLLFNKVT | LADAGFIKQYGDCLGDIAARD |
| Gamma (B.1.1.248)             | GFNFSQILPDPSKPSKRSFIEDLLFNKVT | LADAGFIKQYGDCLGDIAARD |
| Delta (B.1.617.2)             | GFNFSQILPDPSKPSKRSFIEDLLFNKVT | LADAGFIKQYGDCLGDIAARD |
| Delta plus (B.1.617.2 / AY.1) | GFNFSQILPDPSKPSKRSFIEDLLFNKVT | LADAGFIKQYGDCLGDIAARD |
| Epsilon (B.1.429)             | GFNFSQILPDPSKPSKRSFIEDLLFNKVT | LADAGFIKQYGDCLGDIAARD |
| Iota (B.1.526)                | GFNFSQILPDPSKPSKRSFIEDLLFNKVT | LADAGFIKQYGDCLGDIAARD |
| Kappa (B.1.617.1)             | GFNFSQILPDPSKPSKRSFIEDLLFNKVT | LADAGFIKQYGDCLGDIAARD |
| Lambda (C.37)                 | GFNFSQILPDPSKPSKRSFIEDLLFNKVT | LADAGFIKQYGDCLGDIAARD |
| Omicron (B.1.1.529)           | GFNFSQILPDPSKPSKRSFIEDLLFNKVT | LADAGFIKQYGDCLGDIAARD |

|                               | 851               | 900                                |
|-------------------------------|-------------------|------------------------------------|
| Wuhan                         | LICAQKFNGLTVLPPLL | TDEMI AQYTSALLAGTITSGWTFGAGAALQIPF |
| Alpha (B.1.1.7)               | LICAQKFNGLTVLPPLL | TDEMI AQYTSALLAGTITSGWTFGAGAALQIPF |
| Beta (B.1.351)                | LICAQKFNGLTVLPPLL | TDEMI AQYTSALLAGTITSGWTFGAGAALQIPF |
| Gamma (B.1.1.248)             | LICAQKFNGLTVLPPLL | TDEMI AQYTSALLAGTITSGWTFGAGAALQIPF |
| Delta (B.1.617.2)             | LICAQKFNGLTVLPPLL | TDEMI AQYTSALLAGTITSGWTFGAGAALQIPF |
| Delta plus (B.1.617.2 / AY.1) | LICAQKFNGLTVLPPLL | TDEMI AQYTSALLAGTITSGWTFGAGAALQIPF |
| Epsilon (B.1.429)             | LICAQKFNGLTVLPPLL | TDEMI AQYTSALLAGTITSGWTFGAGAALQIPF |
| Iota (B.1.526)                | LICAQKFNGLTVLPPLL | TDEMI AQYTSALLAGTITSGWTFGAGAALQIPF |
| Kappa (B.1.617.1)             | LICAQKFNGLTVLPPLL | TDEMI AQYTSALLAGTITSGWTFGAGAALQIPF |
| Lambda (C.37)                 | LICAQKFNGLTVLPPLL | TDEMI AQYTSALLAGTITSGWTFGAGAALQIPF |
| Omicron (B.1.1.529)           | LICAQKFNGLTVLPPLL | TDEMI AQYTSALLAGTITSGWTFGAGAALQIPF |

|                               | 901           | 950               |
|-------------------------------|---------------|-------------------|
| Wuhan                         | AMQMAYRFNGIGV | TQNVLYENQKLIANQFN |
| Alpha (B.1.1.7)               | AMQMAYRFNGIGV | TQNVLYENQKLIANQFN |
| Beta (B.1.351)                | AMQMAYRFNGIGV | TQNVLYENQKLIANQFN |
| Gamma (B.1.1.248)             | AMQMAYRFNGIGV | TQNVLYENQKLIANQFN |
| Delta (B.1.617.2)             | AMQMAYRFNGIGV | TQNVLYENQKLIANQFN |
| Delta plus (B.1.617.2 / AY.1) | AMQMAYRFNGIGV | TQNVLYENQKLIANQFN |
| Epsilon (B.1.429)             | AMQMAYRFNGIGV | TQNVLYENQKLIANQFN |
| Iota (B.1.526)                | AMQMAYRFNGIGV | TQNVLYENQKLIANQFN |
| Kappa (B.1.617.1)             | AMQMAYRFNGIGV | TQNVLYENQKLIANQFN |
| Lambda (C.37)                 | AMQMAYRFNGIGV | TQNVLYENQKLIANQFN |
| Omicron (B.1.1.529)           | AMQMAYRFNGIGV | TQNVLYENQKLIANQFN |

|                               | 951                                 | 1000            |
|-------------------------------|-------------------------------------|-----------------|
| Wuhan                         | QDVVNQNAQALNTLVKQLSSNFGAISSVLNDILSR | LDKVEAEVQIDRLIT |
| Alpha (B.1.1.7)               | QDVVNQNAQALNTLVKQLSSNFGAISSVLNDILSR | LDKVEAEVQIDRLIT |
| Beta (B.1.351)                | QDVVNQNAQALNTLVKQLSSNFGAISSVLNDILSR | LDKVEAEVQIDRLIT |
| Gamma (B.1.1.248)             | QDVVNQNAQALNTLVKQLSSNFGAISSVLNDILSR | LDKVEAEVQIDRLIT |
| Delta (B.1.617.2)             | QDVVNQNAQALNTLVKQLSSNFGAISSVLNDILSR | LDKVEAEVQIDRLIT |
| Delta plus (B.1.617.2 / AY.1) | QDVVNQNAQALNTLVKQLSSNFGAISSVLNDILSR | LDKVEAEVQIDRLIT |
| Epsilon (B.1.429)             | QDVVNQNAQALNTLVKQLSSNFGAISSVLNDILSR | LDKVEAEVQIDRLIT |
| Iota (B.1.526)                | QDVVNQNAQALNTLVKQLSSNFGAISSVLNDILSR | LDKVEAEVQIDRLIT |
| Kappa (B.1.617.1)             | QDVVNQNAQALNTLVKQLSSNFGAISSVLNDILSR | LDKVEAEVQIDRLIT |
| Lambda (C.37)                 | QDVVNQNAQALNTLVKQLSSNFGAISSVLNDILSR | LDKVEAEVQIDRLIT |
| Omicron (B.1.1.529)           | QDVVNQNAQALNTLVKQLSSNFGAISSVLNDILSR | LDKVEAEVQIDRLIT |

|                               | 1001                                               | 1050 |
|-------------------------------|----------------------------------------------------|------|
| Wuhan                         | GRLQSLQTYVTQQLIRAAEIRASANLAATKMSECVLGQSKRVDFCGKGYH |      |
| Alpha (B.1.1.7)               | GRLQSLQTYVTQQLIRAAEIRASANLAATKMSECVLGQSKRVDFCGKGYH |      |
| Beta (B.1.351)                | GRLQSLQTYVTQQLIRAAEIRASANLAATKMSECVLGQSKRVDFCGKGYH |      |
| Gamma (B.1.1.248)             | GRLQSLQTYVTQQLIRAAEIRASANLAATKMSECVLGQSKRVDFCGKGYH |      |
| Delta (B.1.617.2)             | GRLQSLQTYVTQQLIRAAEIRASANLAATKMSECVLGQSKRVDFCGKGYH |      |
| Delta plus (B.1.617.2 / AY.1) | GRLQSLQTYVTQQLIRAAEIRASANLAATKMSECVLGQSKRVDFCGKGYH |      |
| Epsilon (B.1.429)             | GRLQSLQTYVTQQLIRAAEIRASANLAATKMSECVLGQSKRVDFCGKGYH |      |
| Iota (B.1.526)                | GRLQSLQTYVTQQLIRAAEIRASANLAATKMSECVLGQSKRVDFCGKGYH |      |
| Kappa (B.1.617.1)             | GRLQSLQTYVTQQLIRAAEIRASANLAATKMSECVLGQSKRVDFCGKGYH |      |
| Lambda (C.37)                 | GRLQSLQTYVTQQLIRAAEIRASANLAATKMSECVLGQSKRVDFCGKGYH |      |
| Omicron (B.1.1.529)           | GRLQSLQTYVTQQLIRAAEIRASANLAATKMSECVLGQSKRVDFCGKGYH |      |

.....

|                               | 1051                                                 | 1100 |
|-------------------------------|------------------------------------------------------|------|
| Wuhan                         | LMSFPQSAPHGTVVFLHVTYVPAQEKNFTTAPAICHGDKAHFPREGVVFVSN |      |
| Alpha (B.1.1.7)               | LMSFPQSAPHGTVVFLHVTYVPAQEKNFTTAPAICHGDKAHFPREGVVFVSN |      |
| Beta (B.1.351)                | LMSFPQSAPHGTVVFLHVTYVPAQEKNFTTAPAICHGDKAHFPREGVVFVSN |      |
| Gamma (B.1.1.248)             | LMSFPQSAPHGTVVFLHVTYVPAQEKNFTTAPAICHGDKAHFPREGVVFVSN |      |
| Delta (B.1.617.2)             | LMSFPQSAPHGTVVFLHVTYVPAQEKNFTTAPAICHGDKAHFPREGVVFVSN |      |
| Delta plus (B.1.617.2 / AY.1) | LMSFPQSAPHGTVVFLHVTYVPAQEKNFTTAPAICHGDKAHFPREGVVFVSN |      |
| Epsilon (B.1.429)             | LMSFPQSAPHGTVVFLHVTYVPAQEKNFTTAPAICHGDKAHFPREGVVFVSN |      |
| Iota (B.1.526)                | LMSFPQSAPHGTVVFLHVTYVPAQEKNFTTAPAICHGDKAHFPREGVVFVSN |      |
| Kappa (B.1.617.1)             | LMSFPQSAPHGTVVFLHVTYVPAQEKNFTTAPAICHGDKAHFPREGVVFVSN |      |
| Lambda (C.37)                 | LMSFPQSAPHGTVVFLHVTYVPAQEKNFTTAPAICHGDKAHFPREGVVFVSN |      |
| Omicron (B.1.1.529)           | LMSFPQSAPHGTVVFLHVTYVPAQEKNFTTAPAICHGDKAHFPREGVVFVSN |      |

.....

|                               | 1101                                              | 1150 |
|-------------------------------|---------------------------------------------------|------|
| Wuhan                         | GTHWFTVQRNFYEPQIITTDNTFVSGNCDVIGIVNNTVYDPLQPELDSF |      |
| Alpha (B.1.1.7)               | GTHWFTVQRNFYEPQIITTDNTFVSGNCDVIGIVNNTVYDPLQPELDSF |      |
| Beta (B.1.351)                | GTHWFTVQRNFYEPQIITTDNTFVSGNCDVIGIVNNTVYDPLQPELDSF |      |
| Gamma (B.1.1.248)             | GTHWFTVQRNFYEPQIITTDNTFVSGNCDVIGIVNNTVYDPLQPELDSF |      |
| Delta (B.1.617.2)             | GTHWFTVQRNFYEPQIITTDNTFVSGNCDVIGIVNNTVYDPLQPELDSF |      |
| Delta plus (B.1.617.2 / AY.1) | GTHWFTVQRNFYEPQIITTDNTFVSGNCDVIGIVNNTVYDPLQPELDSF |      |
| Epsilon (B.1.429)             | GTHWFTVQRNFYEPQIITTDNTFVSGNCDVIGIVNNTVYDPLQPELDSF |      |
| Iota (B.1.526)                | GTHWFTVQRNFYEPQIITTDNTFVSGNCDVIGIVNNTVYDPLQPELDSF |      |
| Kappa (B.1.617.1)             | GTHWFTVQRNFYEPQIITTDNTFVSGNCDVIGIVNNTVYDPLQPELDSF |      |
| Lambda (C.37)                 | GTHWFTVQRNFYEPQIITTDNTFVSGNCDVIGIVNNTVYDPLQPELDSF |      |
| Omicron (B.1.1.529)           | GTHWFTVQRNFYEPQIITTDNTFVSGNCDVIGIVNNTVYDPLQPELDSF |      |

.....

|                               | 1151                                               | 1200 |
|-------------------------------|----------------------------------------------------|------|
| Wuhan                         | KEELDKYFKNHTSPDVDLGDISGINASVUNIQQEIDRLNEVAKNLNESLI |      |
| Alpha (B.1.1.7)               | KEELDKYFKNHTSPDVDLGDISGINASVUNIQQEIDRLNEVAKNLNESLI |      |
| Beta (B.1.351)                | KEELDKYFKNHTSPDVDLGDISGINASVUNIQQEIDRLNEVAKNLNESLI |      |
| Gamma (B.1.1.248)             | KEELDKYFKNHTSPDVDLGDISGINASVUNIQQEIDRLNEVAKNLNESLI |      |
| Delta (B.1.617.2)             | KEELDKYFKNHTSPDVDLGDISGINASVUNIQQEIDRLNEVAKNLNESLI |      |
| Delta plus (B.1.617.2 / AY.1) | KEELDKYFKNHTSPDVDLGDISGINASVUNIQQEIDRLNEVAKNLNESLI |      |
| Epsilon (B.1.429)             | KEELDKYFKNHTSPDVDLGDISGINASVUNIQQEIDRLNEVAKNLNESLI |      |
| Iota (B.1.526)                | KEELDKYFKNHTSPDVDLGDISGINASVUNIQQEIDRLNEVAKNLNESLI |      |
| Kappa (B.1.617.1)             | KEELDKYFKNHTSPDVDLGDISGINASVUNIQQEIDRLNEVAKNLNESLI |      |
| Lambda (C.37)                 | KEELDKYFKNHTSPDVDLGDISGINASVUNIQQEIDRLNEVAKNLNESLI |      |
| Omicron (B.1.1.529)           | KEELDKYFKNHTSPDVDLGDISGINASVUNIQQEIDRLNEVAKNLNESLI |      |

.....

|                               | 1201                                               | 1250 |
|-------------------------------|----------------------------------------------------|------|
| Wuhan                         | DLQELGKYEQYIKWPWYIWLGFIAGLIAIVMVTIMLCCMTSCCSCLKGCC |      |
| Alpha (B.1.1.7)               | DLQELGKYEQYIKWPWYIWLGFIAGLIAIVMVTIMLCCMTSCCSCLKGCC |      |
| Beta (B.1.351)                | DLQELGKYEQYIKWPWYIWLGFIAGLIAIVMVTIMLCCMTSCCSCLKGCC |      |
| Gamma (B.1.1.248)             | DLQELGKYEQYIKWPWYIWLGFIAGLIAIVMVTIMLCCMTSCCSCLKGCC |      |
| Delta (B.1.617.2)             | DLQELGKYEQYIKWPWYIWLGFIAGLIAIVMVTIMLCCMTSCCSCLKGCC |      |
| Delta plus (B.1.617.2 / AY.1) | DLQELGKYEQYIKWPWYIWLGFIAGLIAIVMVTIMLCCMTSCCSCLKGCC |      |
| Epsilon (B.1.429)             | DLQELGKYEQYIKWPWYIWLGFIAGLIAIVMVTIMLCCMTSCCSCLKGCC |      |
| Iota (B.1.526)                | DLQELGKYEQYIKWPWYIWLGFIAGLIAIVMVTIMLCCMTSCCSCLKGCC |      |
| Kappa (B.1.617.1)             | DLQELGKYEQYIKWPWYIWLGFIAGLIAIVMVTIMLCCMTSCCSCLKGCC |      |
| Lambda (C.37)                 | DLQELGKYEQYIKWPWYIWLGFIAGLIAIVMVTIMLCCMTSCCSCLKGCC |      |
| Omicron (B.1.1.529)           | DLQELGKYEQYIKWPWYIWLGFIAGLIAIVMVTIMLCCMTSCCSCLKGCC |      |

.....

|                               | 12511258 |
|-------------------------------|----------|
| Wuhan                         | SCGSCCKF |
| Alpha (B.1.1.7)               | SCGSCCKF |
| Beta (B.1.351)                | SCGSCCKF |
| Gamma (B.1.1.248)             | SCGSCCKF |
| Delta (B.1.617.2)             | SCGSCCKF |
| Delta plus (B.1.617.2 / AY.1) | SCGSCCKF |
| Epsilon (B.1.429)             | SCGSCCKF |
| Iota (B.1.526)                | SCGSCCKF |
| Kappa (B.1.617.1)             | SCGSCCKF |
| Lambda (C.37)                 | SCGSCCKF |
| Omicron (B.1.1.529)           | SCGSCCKF |

.....
